# Supplementary material for: The Genomic Impact of Gene Retrocopies: What Have We Learned from Comparative Genomics, Population Genomics, and Transcriptomic Analyses?
Source: PubMed Central journal article supplement — Genome Biol Evol. 2017 Jun 14;9(6):1351–73. doi: 10.1093/gbe/evx081 (PMC5470649; doi:10.1093/gbe/evx081), 2017-06-14
Supplement: evx081_Supp.pdf [file evx081_Supp.pdf]

**Supplementary Table 1. Number of retrocopies, transcribed retrocopies and retrogenes and references**

| <i>Taxonomic group</i>   | <i>Species</i>  | <i>Retrocopies<sup>1</sup></i> | <i>Transcribed Retrocopies</i> | <i>Retrogenes</i> |
|--------------------------|-----------------|--------------------------------|--------------------------------|-------------------|
| <b>Eutherian mammals</b> | Human           | 3664 [1]                       |                                |                   |
|                          |                 | 18556 [2]                      |                                |                   |
|                          |                 | 18700 [3]                      |                                |                   |
|                          |                 | 3951 [4]                       |                                |                   |
|                          |                 | 3590 [5]                       | 1080                           | ~120              |
|                          |                 | 2493 [6]                       |                                | 631               |
|                          |                 | 12,700 [7]                     | 726                            | 692               |
|                          |                 | 3771 [8]                       |                                |                   |
|                          |                 | 4199 [9]                       |                                | 141               |
|                          |                 | 4738 [10]                      |                                | 131               |
|                          |                 | 4097 [11]                      |                                |                   |
|                          |                 | 7831 [12]                      | 1304                           |                   |
|                          |                 | 5159 [13]                      | 358                            | 199               |
|                          |                 | Chimpanzee                     | 2157 [9]                       |                   |
|                          | 1889 [6]        |                                |                                | 476               |
|                          | 7478 [12]       |                                | 1500                           |                   |
|                          | 4873 [13]       |                                | 491                            |                   |
|                          | Gorilla         | 7706 [12]                      | 1461                           |                   |
|                          |                 | 4638 [13]                      | 491                            | 215               |
|                          | Orangutan       | 6873 [12]                      | 846                            |                   |
|                          |                 | 5127 [13]                      | 420                            | 194               |
|                          | Macaque         | 7502 [12]                      | 1324                           |                   |
|                          |                 | 4923 [13]                      | 528                            | 198               |
|                          | Common marmoset | 10465 [12]                     |                                |                   |
|                          | Squirrel monkey | 9320 [12]                      |                                |                   |
|                          | Mouse           | 8438 [2]                       |                                |                   |
|                          |                 | 20360 [3]                      |                                |                   |
| 3137 [8]                 |                 |                                |                                |                   |
| 7109 [12]                |                 |                                |                                |                   |
| 3129 [9]                 |                 |                                | 83                             |                   |

|                         |                               |           |     |          |
|-------------------------|-------------------------------|-----------|-----|----------|
|                         |                               | 2969 [6]  |     | 663      |
|                         |                               | 5569 [13] | 420 | 213      |
|                         | Rat                           | 7364 [12] |     |          |
|                         |                               | 4520 [6]  |     | 567      |
|                         |                               | 3298 [9]  |     | 83       |
|                         |                               | 5889 [13] | 389 | 280      |
|                         | Cow                           | 1996 [6]  |     | 790      |
|                         | Dog                           | 2777 [8]  |     |          |
|                         |                               | 1913 [9]  |     |          |
|                         |                               | 3505 [6]  |     | 409      |
| <b>Marsupials</b>       | Opossum                       | 1992 [8]  |     |          |
|                         |                               | 3036 [13] | 421 | 256      |
| <b>Monotremes</b>       | Platypus                      | 542 [10]  |     | 92       |
|                         |                               | 260 [13]  | 67  | 88       |
| <b>Birds</b>            | Chicken                       | 720 [6]   |     | 321      |
|                         |                               | 78 [10]   |     | 51       |
|                         |                               | 70 [13]   | 30  | 36       |
|                         |                               |           |     | 27 [14]  |
|                         | Zebrafinch                    |           |     | 22 [14]  |
| <b>Reptiles</b>         | <i>Anolis carolinensis</i>    | 404 [10]  |     | 136      |
| <b>Amphibians</b>       | <i>Xenopus tropicalis</i>     | 398 [10]  |     | 140      |
|                         | Zebrafish                     | 652 [15]  |     | 127      |
|                         |                               | 195 [10]  |     | 119      |
|                         | <i>Tetraodon nigroviridis</i> | 644 [6]   |     | 227      |
|                         |                               | 90 [10]   |     | 60       |
|                         | <i>Fugu rubripes</i>          | 182 [10]  |     | 142      |
|                         | Stickleback                   | 132 [10]  |     | 111      |
|                         | Medaka                        | 218 [10]  |     | 131      |
|                         | Coelacanth                    | 472 [16]  |     | 85       |
| <b>Tunicates</b>        | Ciona                         | 110 [10]  |     | 96       |
| <b>Cephalochordates</b> | Lancelet                      | 337 [10]  |     | 176      |
| <b>Diptera</b>          | <i>Drosophila</i>             |           |     | 94 [17]  |
|                         | <i>melanogaster</i>           |           |     | 102 [18] |

|                    |                                    |                       |                       |
|--------------------|------------------------------------|-----------------------|-----------------------|
|                    | <i>Anopheles gambiae</i>           |                       | 190 [19]              |
|                    | <i>Aedes aegypti</i>               |                       | 133 <sup>2</sup> [20] |
| <b>Lepidoptera</b> | Silkworm                           |                       | 27 [14]<br>68 [21]    |
| <b>Nematodes</b>   | <i>Caenorhabditis</i> <sup>3</sup> |                       | 9-48[22, 23]          |
| <b>Dicots</b>      | <i>Arabidopsis thaliana</i>        | 69 [24]<br>83 [25]    | 47<br>251             |
|                    | Poplar                             | 106 [25]              | 95                    |
| <b>Monocots</b>    | Rice                               | 1235 [26]<br>150 [27] | 495                   |
| <b>Algae</b>       | <i>Chlamydomonas</i>               |                       | 60 [28]               |
|                    | <i>Volvox</i>                      |                       | 81 [28]               |

<sup>1</sup>Retrocopies include both retropseudogenes and retrogenes except some references

<sup>2</sup>A minimum of 133 retrogenes were annotated in *A. aegypti*

<sup>3</sup>Retrogenes from five *Caenorhabditis* species are shown

#### Supplementary table references:

1. Ohshima K, Hattori M, Yada T, Gojobori T, Sakaki Y, Okada N: **Whole-genome screening indicates a possible burst of formation of processed pseudogenes and Alu repeats by particular L1 subfamilies in ancestral primates.** *Genome Biol* 2003, **4**(11):R74.
2. Zhang Z, Harrison PM, Liu Y, Gerstein M: **Millions of years of evolution preserved: a comprehensive catalog of the processed pseudogenes in the human genome.** *Genome Res* 2003, **13**(12):2541-2558.
3. Suyama M, Harrington E, Bork P, Torrents D: **Identification and analysis of genes and pseudogenes within duplicated regions in the human and mouse genomes.** *PLoS Comput Biol* 2006, **2**(6):e76.
4. Marques AC, Dupanloup I, Vinckenbosch N, Reymond A, Kaessmann H: **Emergence of young human genes after a burst of retroposition in primates.** *PLoS Biol* 2005, **3**(11):e357.
5. Vinckenbosch N, Dupanloup I, Kaessmann H: **Evolutionary fate of retroposed gene copies in the human genome.** *Proc Natl Acad Sci U S A* 2006, **103**(9):3220-3225.
6. Yu Z, Morais D, Ivanga M, Harrison PM: **Analysis of the role of retrotransposition in gene evolution in vertebrates.** *BMC Bioinformatics* 2007, **8**:308.
7. Baertsch R, Diekhans M, Kent WJ, Haussler D, Brosius J: **Retrocopy contributions to the evolution of the human genome.** *BMC Genomics* 2008, **9**:466.

8. Potrzebowski L, Vinckenbosch N, Marques AC, Chalmel F, Jegou B, Kaessmann H: **Chromosomal gene movements reflect the recent origin and biology of therian sex chromosomes.** *PLoS Biol* 2008, **6**(4):e80.
9. Jun J, Ryvkin P, Hemphill E, Mandoiu I, Nelson C: **The birth of new genes by RNA- and DNA-mediated duplication during mammalian evolution.** *J Comput Biol* 2009, **16**(10):1429-1444.
10. Chen M, Zou M, Fu B, Li X, Vibranovski MD, Gan X, Wang D, Wang W, Long M, He S: **Evolutionary patterns of RNA-based duplication in non-mammalian chordates.** *PLoS One* 2011, **6**(7):e21466.
11. Zhang Q: **The role of mRNA-based duplication in the evolution of the primate genome.** *FEBS Lett* 2013, **587**(21):3500-3507.
12. Navarro FC, Galante PA: **A Genome-Wide Landscape of Retrocopies in Primate Genomes.** *Genome Biol Evol* 2015, **7**(8):2265-2275.
13. Carelli FN, Hayakawa T, Go Y, Imai H, Warnefors M, Kaessmann H: **The life history of retrocopies illuminates the evolution of new mammalian genes.** *Genome Res* 2016, **26**(3):301-314.
14. Toups MA, Pease JB, Hahn MW: **No excess gene movement is detected off the avian or lepidopteran Z chromosome.** *Genome Biol Evol* 2011, **3**:1381-1390.
15. Fu B, Chen M, Zou M, Long M, He S: **The rapid generation of chimerical genes expanding protein diversity in zebrafish.** *BMC Genomics* 2010, **11**:657.
16. Du K, He S: **Evolutionary fate and implications of retrocopies in the African coelacanth genome.** *BMC Genomics* 2015, **16**:915.
17. Bai Y, Casola C, Feschotte C, Betran E: **Comparative genomics reveals a constant rate of origination and convergent acquisition of functional retrogenes in Drosophila.** *Genome Biol* 2007, **8**(1):R11.
18. Zhang YE, Vibranovski MD, Krinsky BH, Long M: **Age-dependent chromosomal distribution of male-biased genes in Drosophila.** *Genome Res* 2010, **20**(11):1526-1533.
19. Baker DA, Russell S: **Role of testis-specific gene expression in sex-chromosome evolution of Anopheles gambiae.** *Genetics* 2011, **189**(3):1117-1120.
20. Toups MA, Hahn MW: **Retrogenes reveal the direction of sex-chromosome evolution in mosquitoes.** *Genetics* 2010, **186**(2):763-766.
21. Wang J, Long M, Vibranovski MD: **Retrogenes moved out of the z chromosome in the silkworm.** *J Mol Evol* 2012, **74**(3-4):113-126.
22. Zou M, Wang G, He S: **Evolutionary patterns of RNA-based gene duplicates in Caenorhabditis nematodes coincide with their genomic features.** *BMC Res Notes* 2012, **5**:398.
23. Zhou K, Zou M, Duan M, He S, Wang G: **Identification and analysis of retrogenes in the East Asian nematode Caenorhabditis sp. 5 genome.** *Genome* 2015, **58**(7):349-355.
24. Zhang Y, Wu Y, Liu Y, Han B: **Computational identification of 69 retroposons in Arabidopsis.** *Plant Physiol* 2005, **138**(2):935-948.
25. Zhu Z, Zhang Y, Long M: **Extensive structural renovation of retrogenes in the evolution of the Populus genome.** *Plant Physiol* 2009, **151**(4):1943-1951.

26. Wang W, Zheng H, Fan C, Li J, Shi J, Cai Z, Zhang G, Liu D, Zhang J, Vang S *et al*: **High rate of chimeric gene origination by retroposition in plant genomes.** *Plant Cell* 2006, **18**(8):1791-1802.
27. Sakai H, Mizuno H, Kawahara Y, Wakimoto H, Ikawa H, Kawahigashi H, Kanamori H, Matsumoto T, Itoh T, Gaut BS: **Retrogenes in rice (*Oryza sativa* L. ssp. japonica) exhibit correlated expression with their source genes.** *Genome Biol Evol* 2011, **3**:1357-1368.
28. Jakalski M, Takeshita K, Deblieck M, Koyanagi KO, Makalowska I, Watanabe H, Makalowski W: **Comparative genomic analysis of retrogene repertoire in two green algae *Volvox carteri* and *Chlamydomonas reinhardtii*.** *Biol Direct* 2016, **11**:35.
